# Supplementary material for: Swallowing Exercise During Head and Neck Cancer Treatment: Results of a Randomized Trial
Source: Springer Nature journal article supplement (doi:10.1007/s00455-021-10320-5), 2021-06-11
Supplement: MOESM2 [file 19251788]

**Online resource 2:** Effect of intervention at end-of-treatment and 2, 6 and 12 months after end-of-treatment: Results of analyses of association between group allocation (intervention group vs. control group) and healthy functional level (binary outcomes) of 235 HNC patients, SYNK trial, 2015-2019, with adjustment for HPV(p16), sex, age group, marital status, tumor-site and chemo.

|                                                    | No. of cases with normal function (%) |                        | OR   | 95% CI       | p           |
|----------------------------------------------------|---------------------------------------|------------------------|------|--------------|-------------|
|                                                    | Intervention group<br>n=120           | Control group<br>n=115 |      |              |             |
| <b>PAS, liquid consistency, with scores &lt; 3</b> |                                       |                        |      |              |             |
| 2 months                                           | 76 (63)                               | 76 (66)                | 0.88 | [0.38; 2.03] | 0.77        |
| 1 year                                             | 78 (65)                               | 75 (65)                | 0.61 | [0.24; 1.57] | 0.31        |
| <b>PAS, honey consistency, with scores &lt; 3</b>  |                                       |                        |      |              |             |
| 2 months                                           | 91 (76)                               | 93 (81)                | 1.10 | [0.33; 3.62] | 0.88        |
| 1 year                                             | 86 (72)                               | 83 (72)                | 0.98 | [0.24; 4.03] | 0.98        |
| <b>ECOG performance status with scores &lt; 2</b>  |                                       |                        |      |              |             |
| End of treatment                                   | 71 (59)                               | 73 (63)                | 1.09 | [0.55; 2.15] | 0.80        |
| 2 months                                           | 97 (81)                               | 94 (82)                | 1.20 | [0.39; 3.64] | 0.75        |
| 6 months                                           | 83 (69)                               | 77 (67)                | 0.93 | [0.14; 6.10] | 0.94        |
| 12 months                                          | 92 (77)                               | 88 (77)                | 0.37 | [0.03; 5.01] | 0.45        |
| <b>MID ≥ 35mm</b>                                  |                                       |                        |      |              |             |
| End of treatment                                   | 83 (69)                               | 84 (73)                | 2.03 | [1.11; 3.69] | <b>0.02</b> |
| 2 months                                           | 90 (75)                               | 90 (78)                | 0.74 | [0.39; 1.41] | 0.36        |
| 6 months                                           | 71 (59)                               | 70 (61)                | 0.43 | [0.19; 0.96] | <b>0.04</b> |
| 12 months                                          | 82 (68)                               | 80 (70)                | 0.49 | [0.21; 1.16] | 0.11        |
| <b>FOIS with scores = 7 (no restrictions)</b>      |                                       |                        |      |              |             |
| End of treatment                                   | 8 (7)                                 | 11 (10)                | 0.85 | [0.33; 2.23] | 0.75        |
| 2 months                                           | 48 (40)                               | 35 (30)                | 1.61 | [0.88; 2.92] | 0.12        |
| 6 months                                           | 55 (46)                               | 46 (37)                | 1.30 | [0.70; 2.43] | 0.41        |
| 12 months                                          | 62 (52)                               | 61 (53)                | 0.79 | [0.43; 1.46] | 0.45        |
| <b>Gargle (yes)</b>                                |                                       |                        |      |              |             |
| End of treatment                                   | 70 (58)                               | 69 (60)                | 0.81 | [0.37; 1.78] | 0.61        |
| 2 months                                           | 80 (67)                               | 82 (71)                | 0.51 | [0.25; 1.20] | 0.13        |
| 6 months                                           | 72 (60)                               | 69 (60)                | 0.78 | [0.26; 2.27] | 0.64        |
| 12 months                                          | 74 (62)                               | 78 (68)                | 0.16 | [0.04; 0.65] | <b>0.01</b> |
| <b>Whistle (yes)</b>                               |                                       |                        |      |              |             |
| End of treatment                                   | 74 (62)                               | 79 (69)                | 0.89 | [0.40; 1.98] | 0.78        |
| 2 months                                           | 87 (73)                               | 84 (73)                | 0.83 | [0.37; 1.90] | 0.67        |
| 6 months                                           | 73 (61)                               | 69 (60)                | 0.78 | [0.30; 2.04] | 0.61        |
| 12 months                                          | 75 (63)                               | 77 (67)                | 0.54 | [0.22; 1.29] | 0.17        |

HNC, Head & Neck Cancer; OR, Odds Ratio; HPV, Human Papilloma Virus; CI, Confidence Interval; PAS, Penetration Aspiration Scale; ECOG, Eastern Cooperative Oncology Group; MID, Maximum Interincisal Distance; FOIS, Functional Oral Intake Scale

**Article title:** Swallowing exercises during head and neck cancer treatment – results of a randomized trial  
**Journal:** *Dysphagia*.

**Authors:** Hajdú SF, Wessel I, Dalton SO, Eskildsen, SJ, Johansen C.

**Corresponding author:** Sara Fredslund Hajdú, dept of occupational therapy and physiotherapy, Copenhagen University Hospital Rigshospitalet, Denmark & Cancer Late Effects Research Unit (CASTLE), Department of Oncology, Copenhagen University Hospital Rigshospitalet, Denmark.

[sara.fredslund.hajdu@regionh.dk](mailto:sara.fredslund.hajdu@regionh.dk)
