# Supplementary material for: Swallowing Exercise During Head and Neck Cancer Treatment: Results of a Randomized Trial
Source: Springer Nature journal article supplement (doi:10.1007/s00455-021-10320-5), 2021-06-11
Supplement: MOESM3 [file 19251788]

**Online resource 3:** Participants presenting with and developing selected symptoms during the first year after end-of-treatment. Analysis of 235 head and neck cancer patients, SYNK trial, 2015-2018.

|                                           | Intervention group (n=120) |             |             |             |             | Control group (n=115) |             |             |             |             |
|-------------------------------------------|----------------------------|-------------|-------------|-------------|-------------|-----------------------|-------------|-------------|-------------|-------------|
|                                           | Baseline<br>n (%)          | T1<br>n (%) | T2<br>n (%) | T3<br>n (%) | T4<br>n (%) | Baseline<br>n (%)     | T1<br>n (%) | T2<br>n (%) | T3<br>n (%) | T4<br>n (%) |
| Penetration/Aspiration liquid consistency |                            |             |             |             |             |                       |             |             |             |             |
| Abnormal (PAS >2)                         | 6 (5)                      |             | 21 (18)     |             | 12 (10)     | 9 (8)                 |             | 21 (18)     |             | 11 (10)     |
| Normal PAS                                | 113 (94)                   |             | 76 (63)     |             | 78 (65)     | 106 (92)              |             | 76 (66)     |             | 75 (65)     |
| Missing                                   | 1 (1)                      |             | 23 (19)     |             | 30 (25)     | -                     |             | 18 (16)     |             | 29 (25)     |
| Penetration/Aspiration honey consistency  |                            |             |             |             |             |                       |             |             |             |             |
| Abnormal (PAS >2)                         | 6 (5)                      |             | 6 (5)       |             | 4 (3)       | 3 (3)                 |             | 4 (3)       |             | 3 (3)       |
| Normal PAS                                | 112 (93)                   |             | 91 (76)     |             | 86 (72)     | 111 (96)              |             | 93 (81)     |             | 83 (72)     |
| Missing                                   | 2 (2)                      |             | 23 (19)     |             | 30 (25)     | 1 (1)                 |             | 18 (16)     |             | 29 (25)     |
| Mouth opening                             |                            |             |             |             |             |                       |             |             |             |             |
| Trismus (MID <35)                         | 13 (11)                    | 12 (10)     | 13 (11)     | 10 (8)      | 10 (8)      | 8 (7)                 | 17 (15)     | 8 (7)       | 6 (5)       | 8 (7)       |
| MID ≥ 35mm                                | 107 (89)                   | 83 (69)     | 90 (75)     | 71 (59)     | 82 (68)     | 105 (91)              | 84 (73)     | 90 (78)     | 70 (61)     | 80 (70)     |
| Missing                                   | 0                          | 25 (21)     | 17 (14)     | 39 (33)     | 28 (23)     | 2 (2)                 | 14 (12)     | 17 (15)     | 39 (34)     | 27 (23)     |
| Functional Oral Intake                    |                            |             |             |             |             |                       |             |             |             |             |
| Impaired (FOIS <7)                        | 36 (30)                    | 90 (75)     | 55 (46)     | 29 (24)     | 31 (26)     | 30 (26)               | 94 (82)     | 66 (57)     | 34 (30)     | 29 (25)     |
| Normal                                    | 84 (70)                    | 8 (7)       | 48 (40)     | 55 (46)     | 62 (52)     | 85 (74)               | 11 (10)     | 35 (30)     | 46 (40)     | 61 (53)     |
| Missing                                   | 0                          | 22 (18)     | 17 (14)     | 36 (30)     | 27 (23)     | 0                     | 10 (9)      | 14 (12)     | 35 (30)     | 25 (22)     |
| Tube Dependence                           |                            |             |             |             |             |                       |             |             |             |             |
| Tube dependent                            | 3 (3)                      | 62 (52)     | 16 (13)     | 2 (2)       | 1 (1)       | 4 (3)                 | 59 (51)     | 8 (7)       | 4 (3)       | -           |
| Complete oral diet                        | 117 (98)                   | 36 (30)     | 87 (73)     | 82 (86)     | 92 (77)     | 111 (97)              | 46 (40)     | 93 (81)     | 76 (66)     | 90 (78)     |
| Missing                                   | 0                          | 22 (18)     | 17 (14)     | 36 (30)     | 27 (23)     | 0                     | 10 (9)      | 14 (12)     | 35 (30)     | 25 (22)     |
| Gargle water                              |                            |             |             |             |             |                       |             |             |             |             |
| Cannot gargle                             | 14 (12)                    | 25 (21)     | 20 (17)     | 7 (6)       | 13 (11)     | 17 (15)               | 27 (23)     | 13 (11)     | 6 (5)       | 4 (3)       |
| Can gargle                                | 102 (85)                   | 70 (58)     | 80 (67)     | 72 (60)     | 74 (62)     | 88 (77)               | 69 (60)     | 82 (71)     | 69 (60)     | 78 (68)     |
| Missing                                   | 4 (3)                      | 25 (21)     | 20 (17)     | 41 (34)     | 33 (28)     | 10 (9)                | 19 (17)     | 20 (17)     | 40 (35)     | 33 (29)     |
| Whistle with sound                        |                            |             |             |             |             |                       |             |             |             |             |
| Cannot whistle                            | 21 (18)                    | 21 (18)     | 17 (14)     | 10 (8)      | 15 (13)     | 14 (12)               | 19 (17)     | 13 (11)     | 8 (7)       | 10 (9)      |
| Can whistle                               | 99 (83)                    | 74 (62)     | 87 (73)     | 73 (61)     | 75 (63)     | 99 (86)               | 79 (69)     | 84 (73)     | 69 (60)     | 77 (67)     |
| Missing                                   | 0                          | 25 (21)     | 16 (13)     | 37 (31)     | 30 (25)     | 2 (2)                 | 17 (15)     | 18 (16)     | 38 (33)     | 28 (24)     |
| Depression, MDI                           |                            |             |             |             |             |                       |             |             |             |             |
| Any level (≥ 20)                          | 14 (12)                    | 32 (27)     | 16 (13)     | 5 (4)       | 5 (4)       | 9 (8)                 | 29 (25)     | 13 (11)     | 5 (4)       | 6 (5)       |
| Mild (20-24)                              | 6 (5)                      | 14 (12)     | 4 (3)       | 1 (1)       | 2 (2)       | 3 (3)                 | 11 (10)     | 2 (2)       | 4 (3)       | 2 (2)       |

**Online resource 3 continued:** Participants presenting with and developing selected symptoms during the first year after end-of-treatment. Analysis of 235 head and neck cancer patients, SYNK trial, 2015-2018.

|                      |          |         |         |         |         |          |         |         |         |         |
|----------------------|----------|---------|---------|---------|---------|----------|---------|---------|---------|---------|
| Moderate (25-29)     | 5 (4)    | 10 (8)  | 7 (6)   | 2 (2)   | 2 (2)   | 2 (2)    | 8 (7)   | 7 (6)   | 0       | 0       |
| Severe ( $\geq 30$ ) | 3 (3)    | 8 (7)   | 5 (4)   | 2 (2)   | 1 (1)   | 4 (3)    | 10 (9)  | 4 (3)   | 1 (1)   | 4 (3)   |
| None (<20)           | 102 (85) | 52 (43) | 81 (68) | 78 (65) | 79 (66) | 100 (87) | 50 (43) | 78 (68) | 68 (59) | 78 (68) |
| Missing              | 4 (3)    | 36 (30) | 23 (19) | 37 (31) | 36 (30) | 6 (5)    | 36 (31) | 24 (21) | 42 (37) | 31 (30) |
| BMI <sup>8</sup>     |          |         |         |         |         |          |         |         |         |         |
| Underweight (<18.5)  | 5 (4)    | 3 (3)   | 7 (6)   | 4 (3)   | 5 (4)   | 2 (2)    | 5 (4)   | 7 (6)   | 7 (6)   | 5 (4)   |
| Normal (18.5-25)     | 44 (37)  | 43 (36) | 50 (42) | 42 (35) | 40 (33) | 44 (38)  | 48 (42) | 53 (46) | 42 (37) | 38 (33) |
| Obese (>25)          | 68 (57)  | 42 (35) | 43 (36) | 37 (31) | 46 (38) | 69 (60)  | 44 (38) | 41 (36) | 30 (26) | 47 (41) |
| Missing              | 3 (3)    | 32 (27) | 20 (17) | 37 (31) | 29 (24) | 0        | 18 (16) | 14 (12) | 36 (31) | 25 (22) |

T1-T4: End-of-treatment, and 2-, 6- and 12 months after treatment; MID: Maximal Interincisal Distance; FOIS: Functional Oral Intake Scale; PAS: Penetration Aspiration Scale; MDI: Major Depression Inventory; BMI: Body Mass Index.

**Article title:** Swallowing exercises during head and neck cancer treatment – results of a randomized trial

**Journal:** *Dysphagia*.

**Authors:** Hajdú SF, Wessel I, Dalton SO, Eskildsen, SJ, Johansen C.

**Corresponding author:** Sara Fredslund Hajdú, dept of occupational therapy and physiotherapy, Copenhagen University Hospital Rigshospitalet, Denmark & Cancer Late Effects Research Unit (CASTLE), Department of Oncology, Copenhagen University Hospital Rigshospitalet, Denmark.

[sara.fredslund.hajdu@regionh.dk](mailto:sara.fredslund.hajdu@regionh.dk)
