# Supplementary material for: Swallowing Exercise During Head and Neck Cancer Treatment: Results of a Randomized Trial
Source: Springer Nature journal article supplement (doi:10.1007/s00455-021-10320-5), 2021-06-11
Supplement: MOESM4 [file 19251788]

**Online resource 4: Raw data graphs on four group**

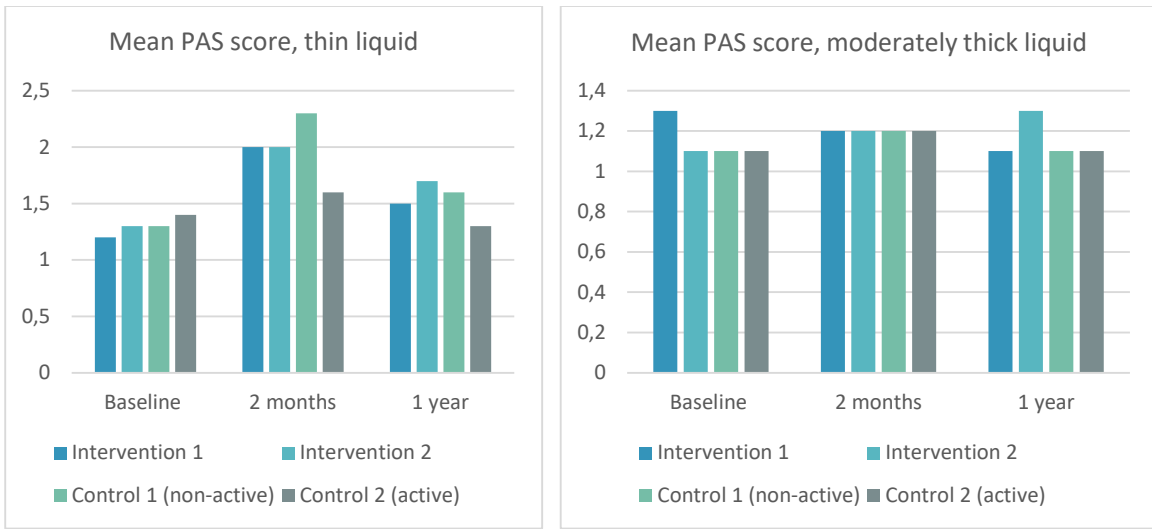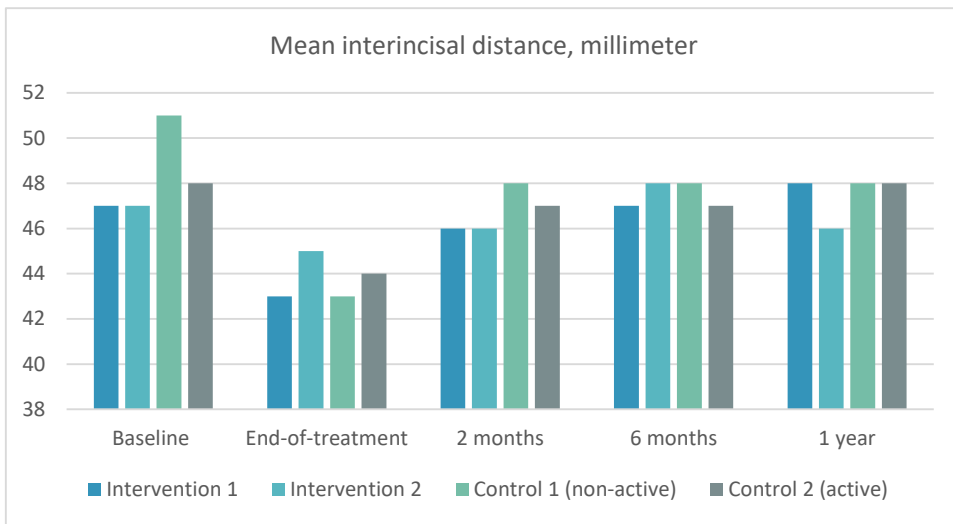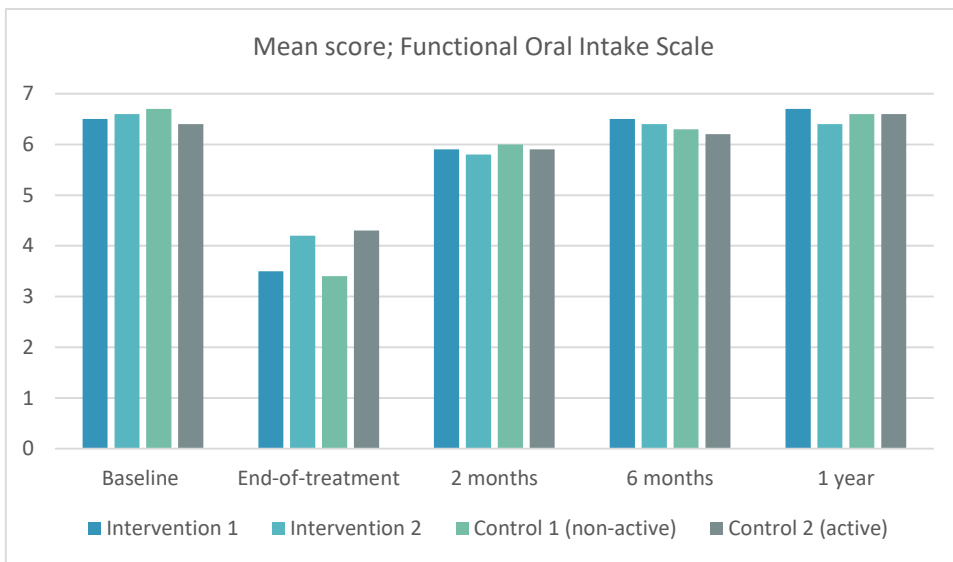

#### Online resource 4: Raw data graphs on four group

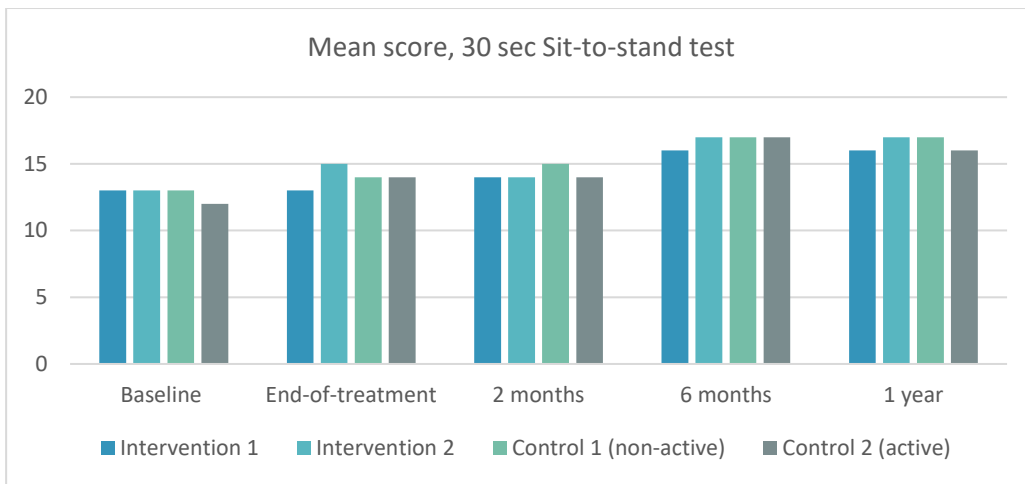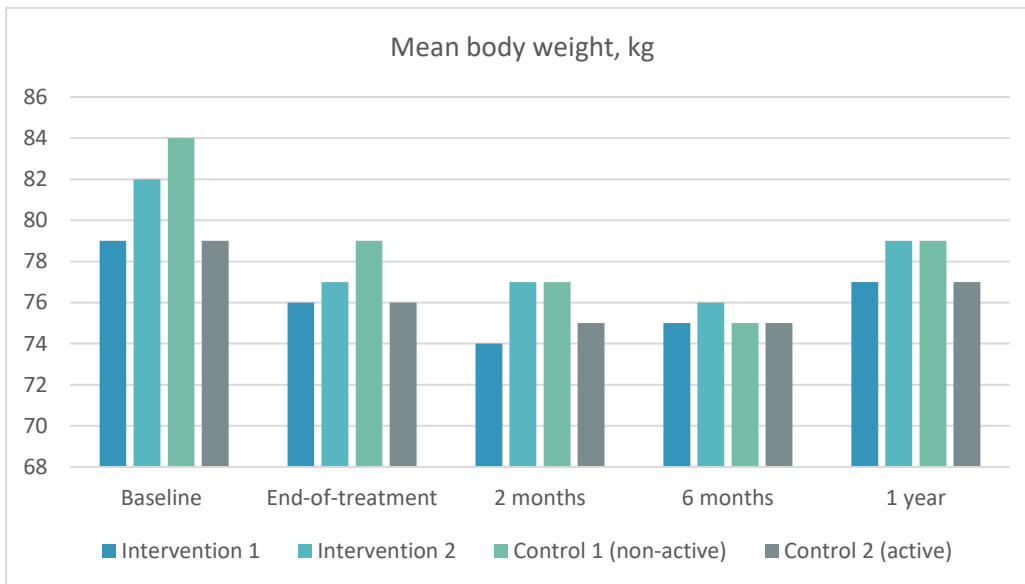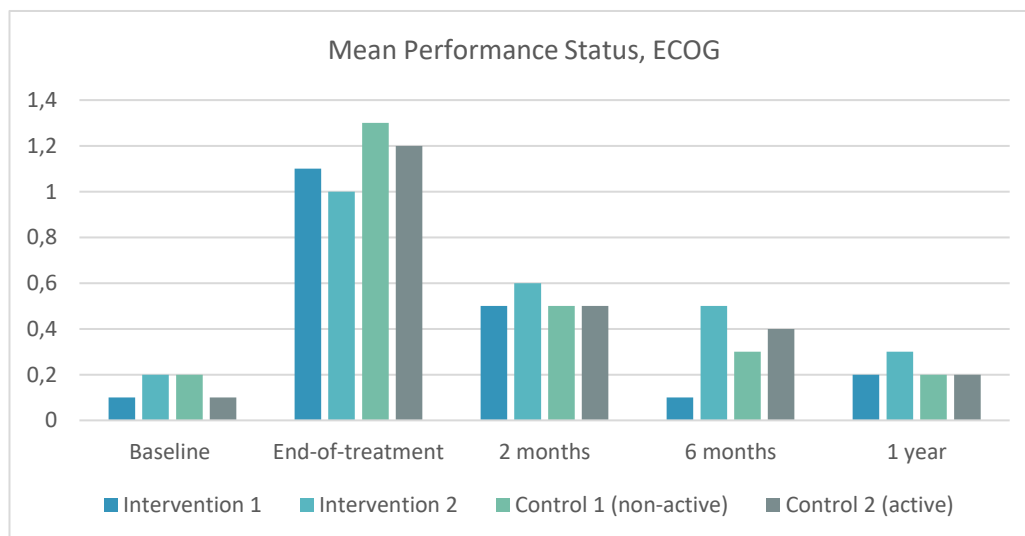

#### Online resource 4: Raw data graphs on four group

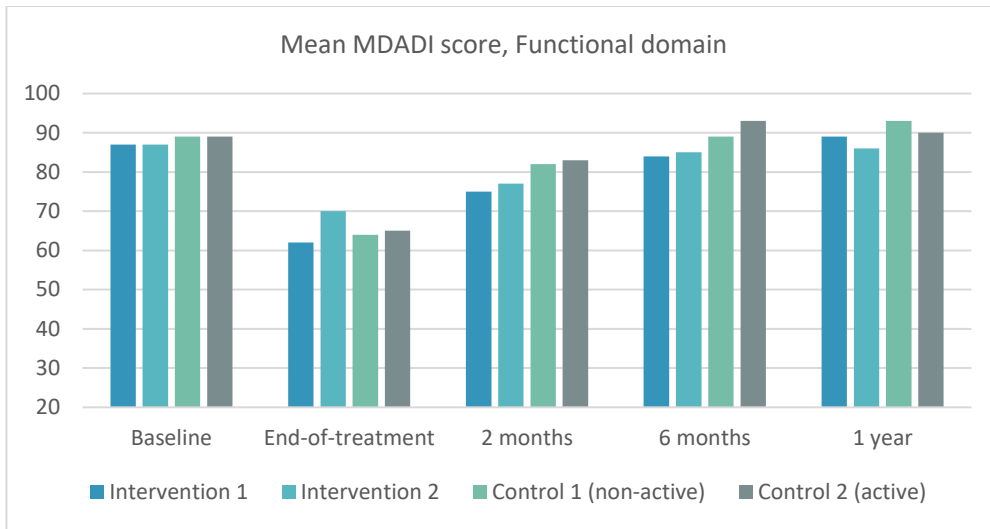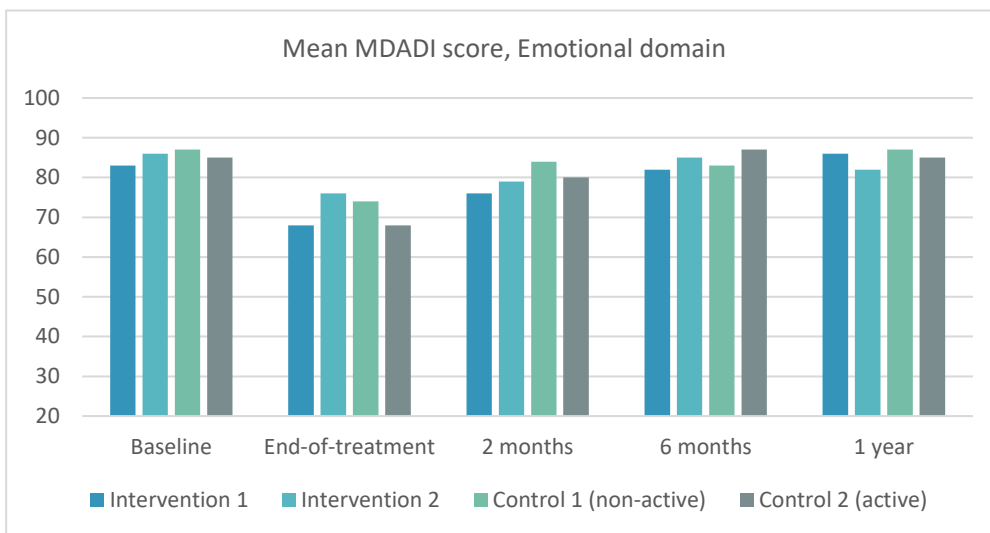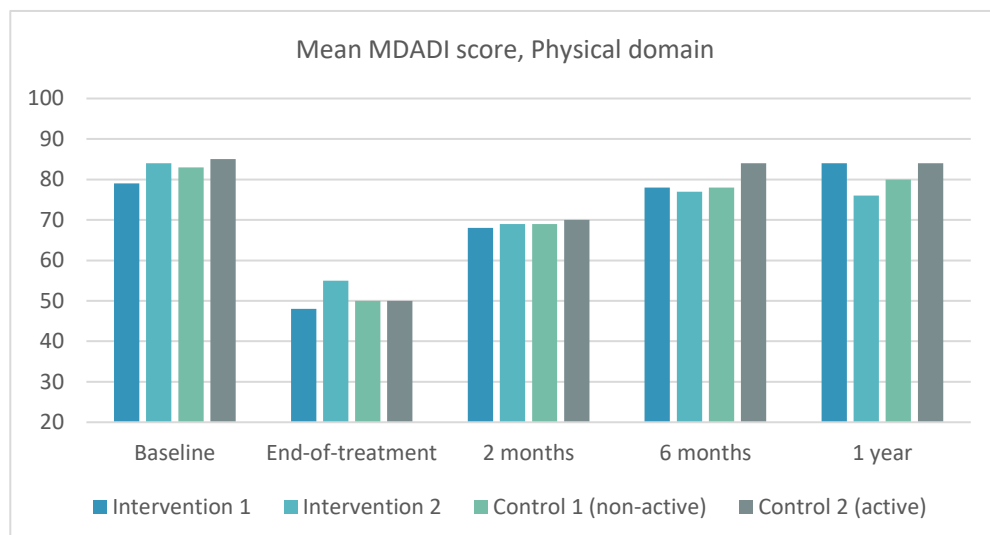

#### Online resource 4: Raw data graphs on four group

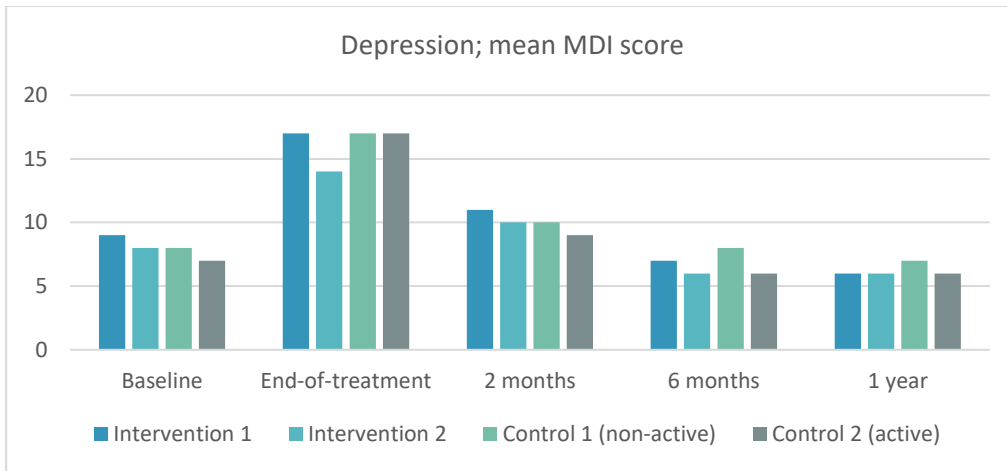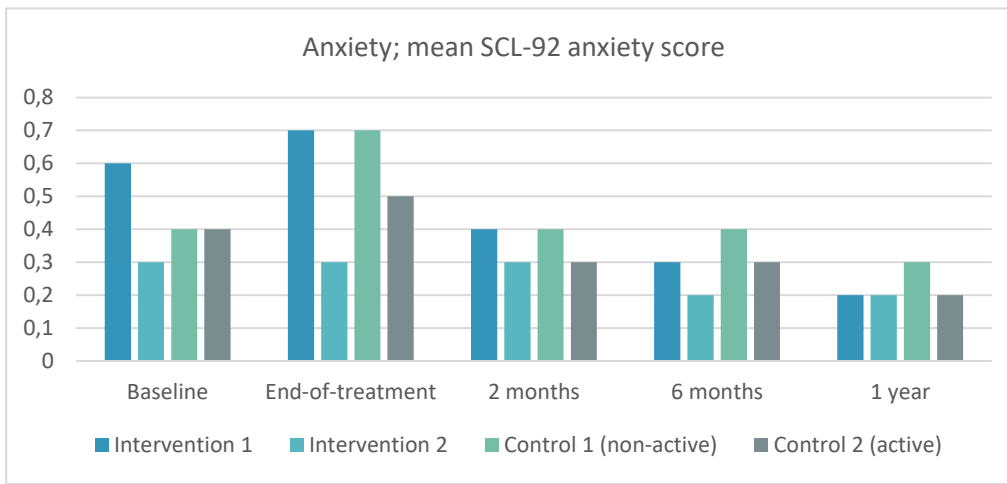

### Online resource 4: Raw data graphs on four group

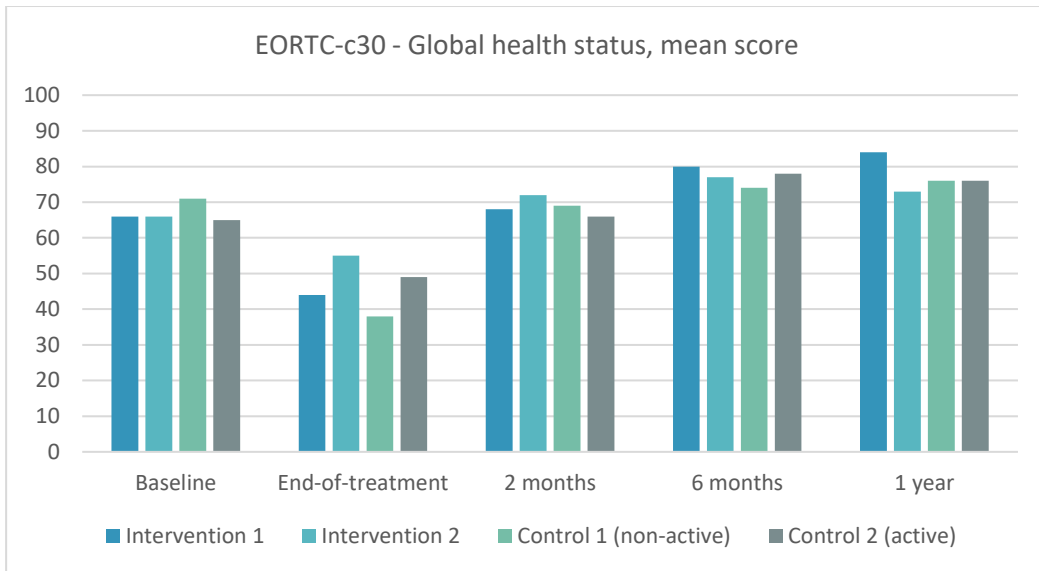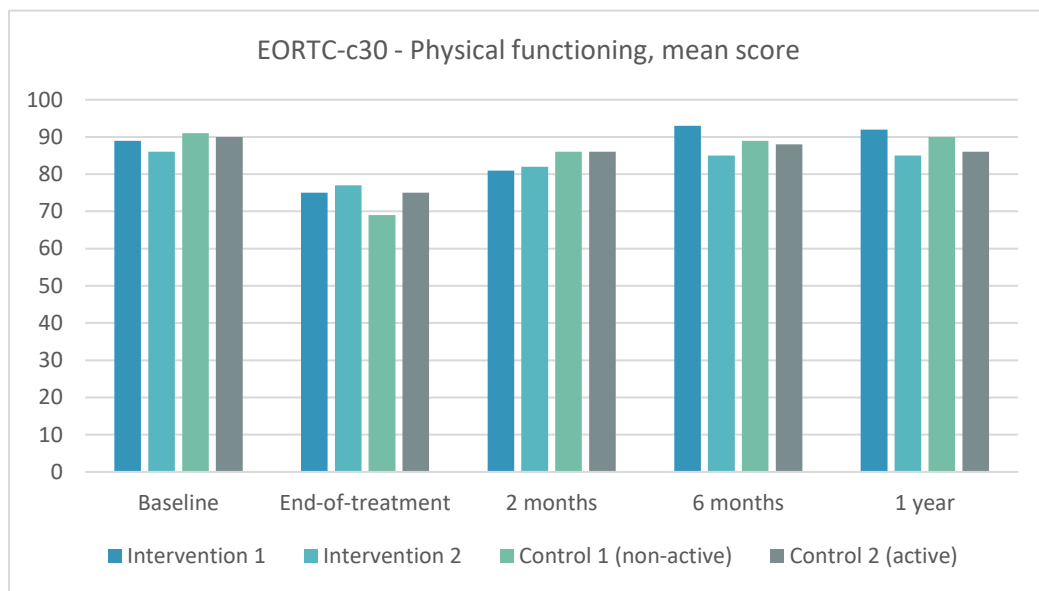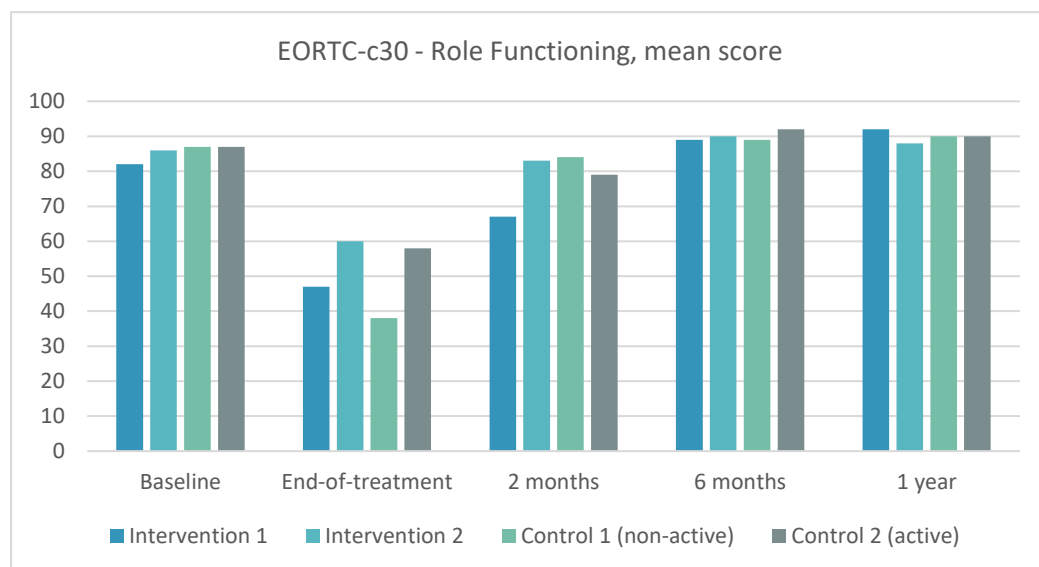

#### Online resource 4: Raw data graphs on four group

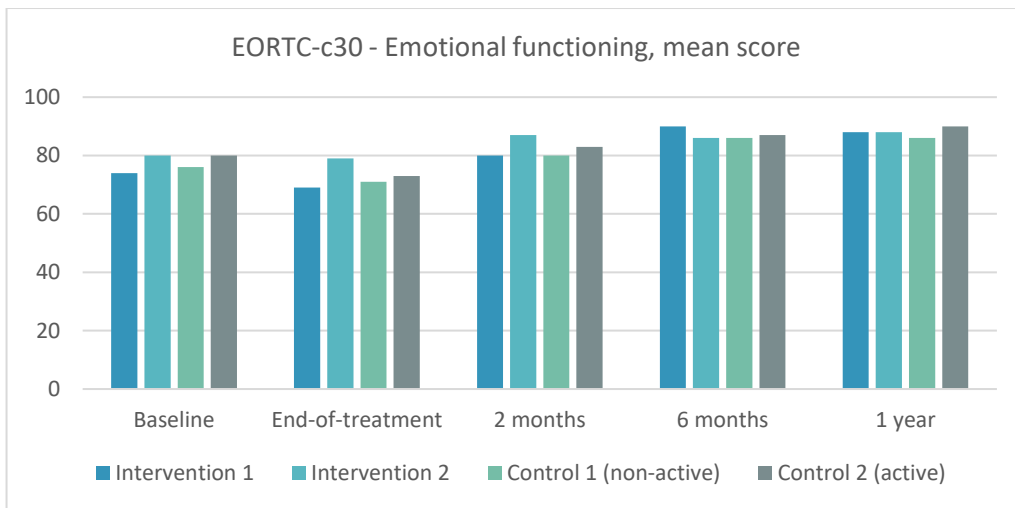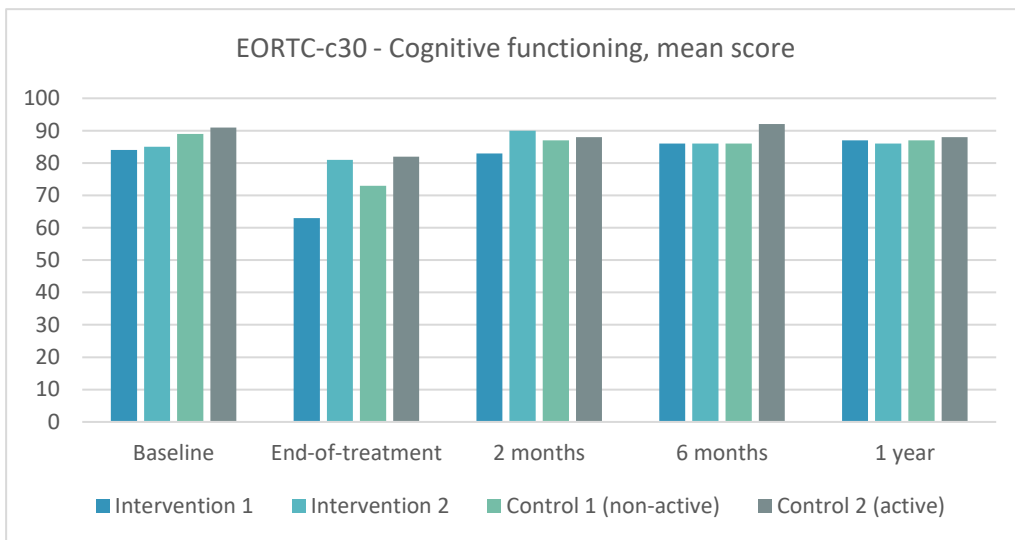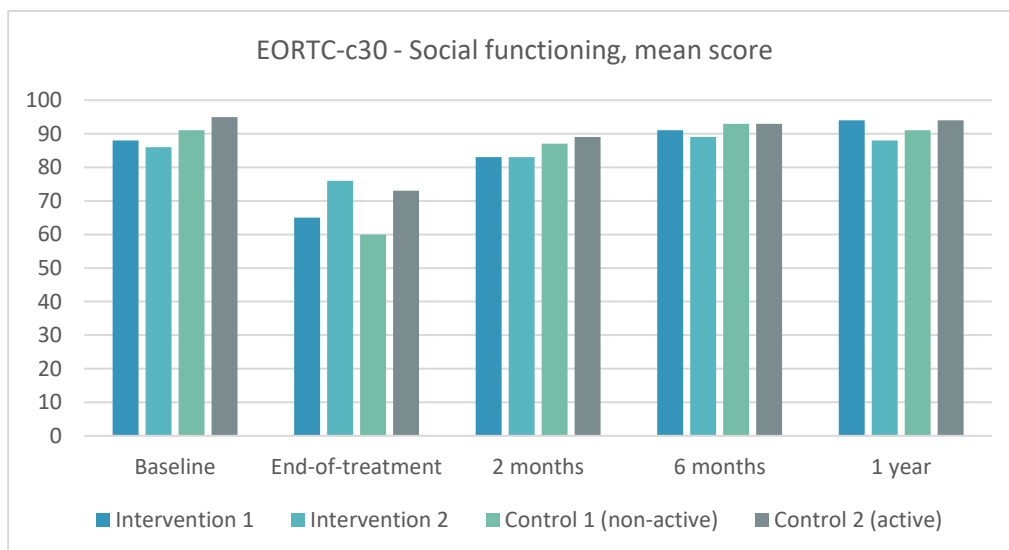

### Online resource 4: Raw data graphs on four group

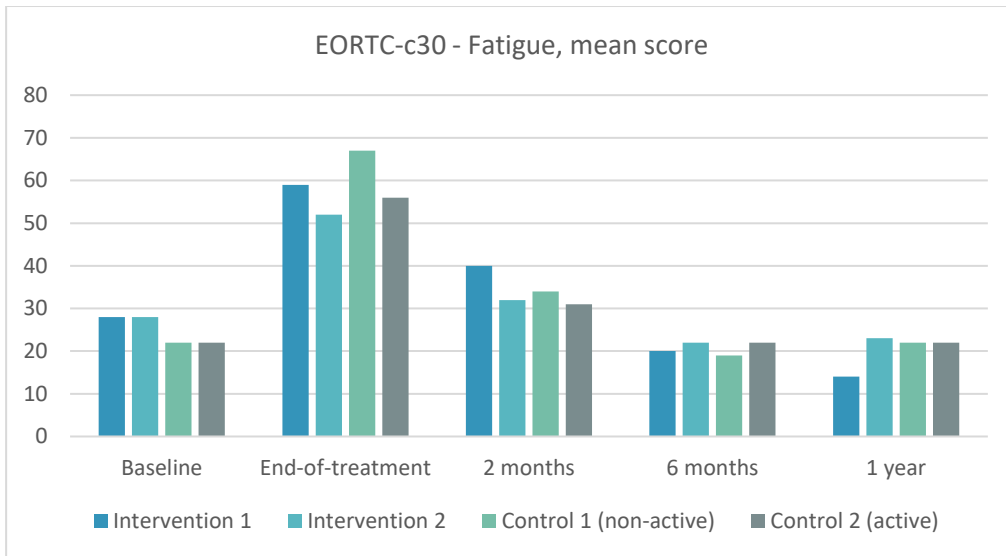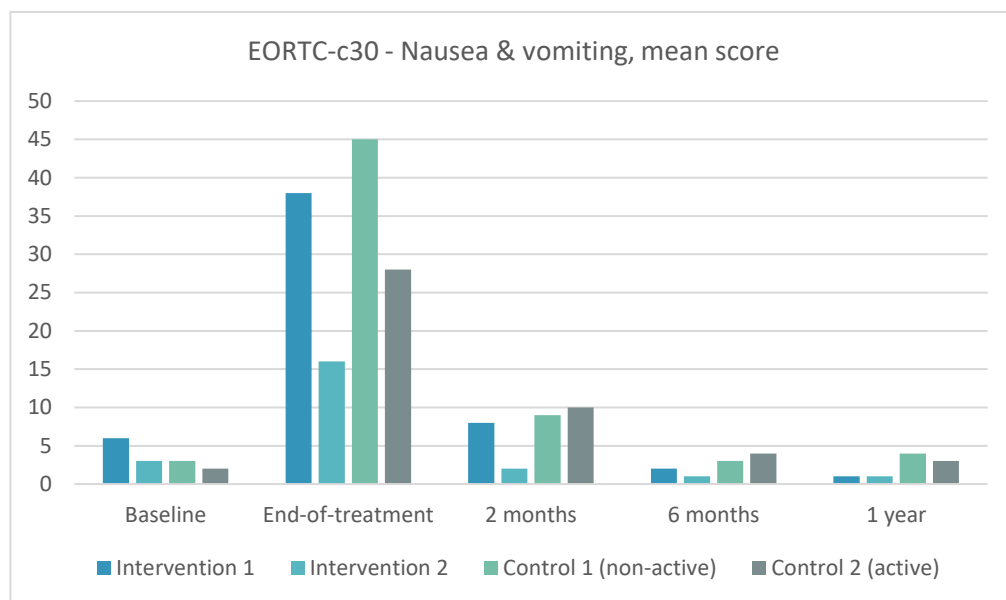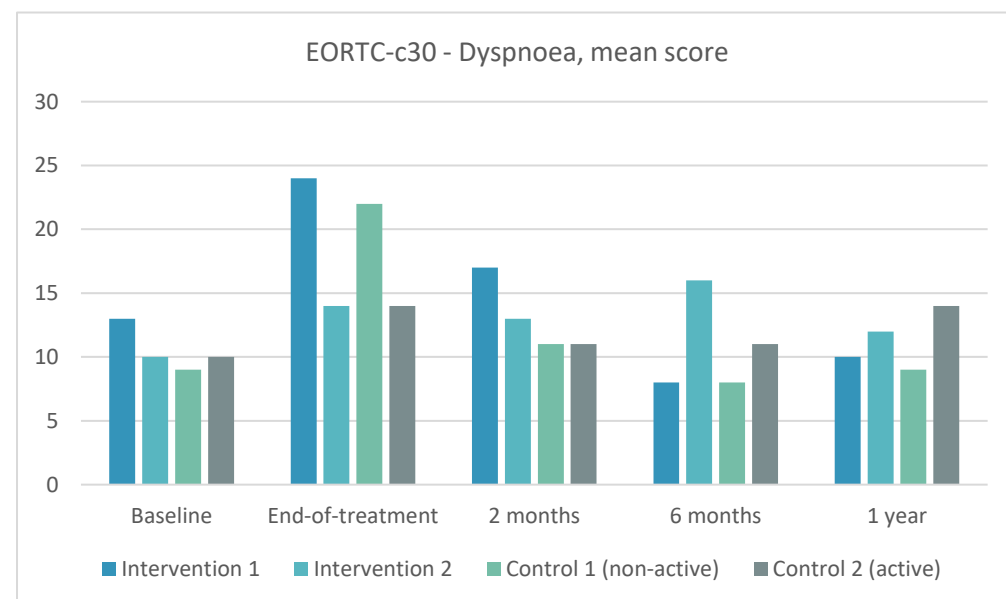

### Online resource 4: Raw data graphs on four group

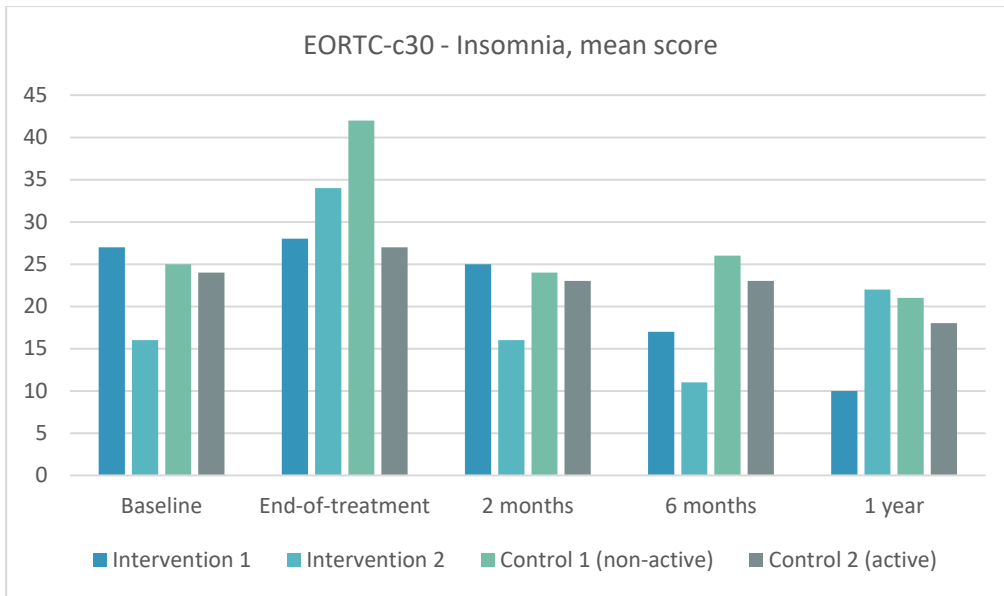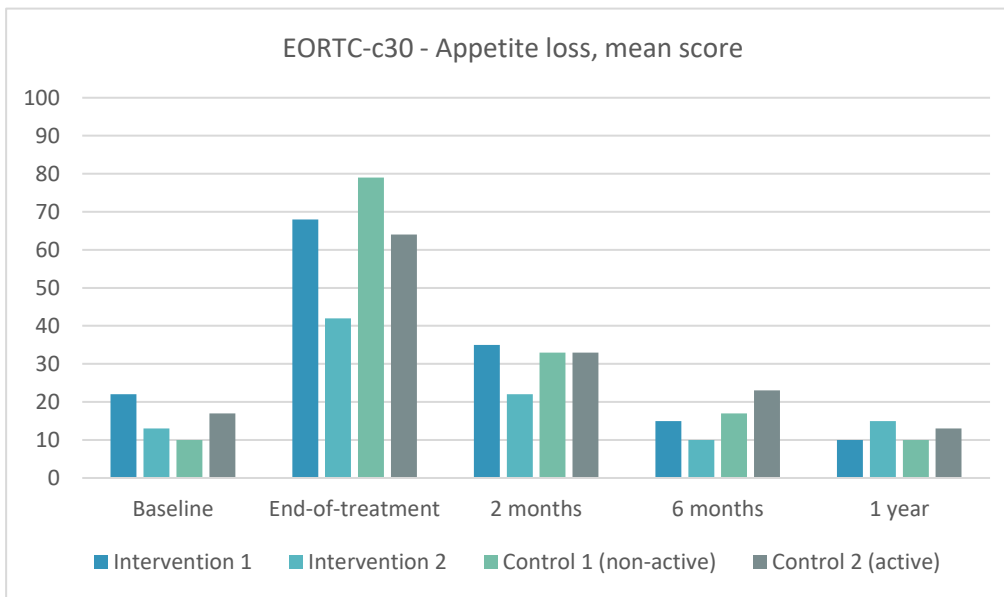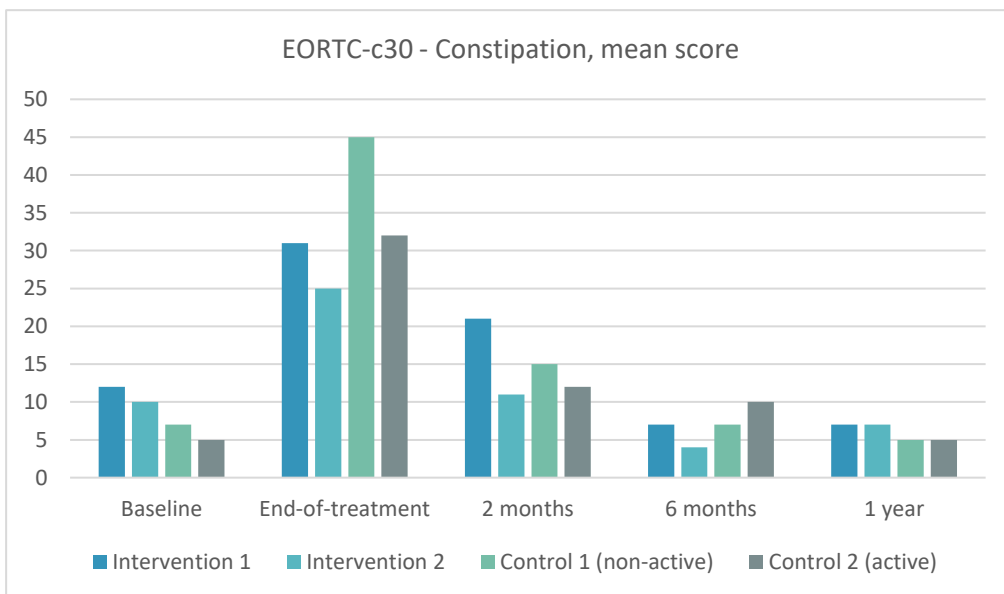



#### Online resource 4: Raw data graphs on four group

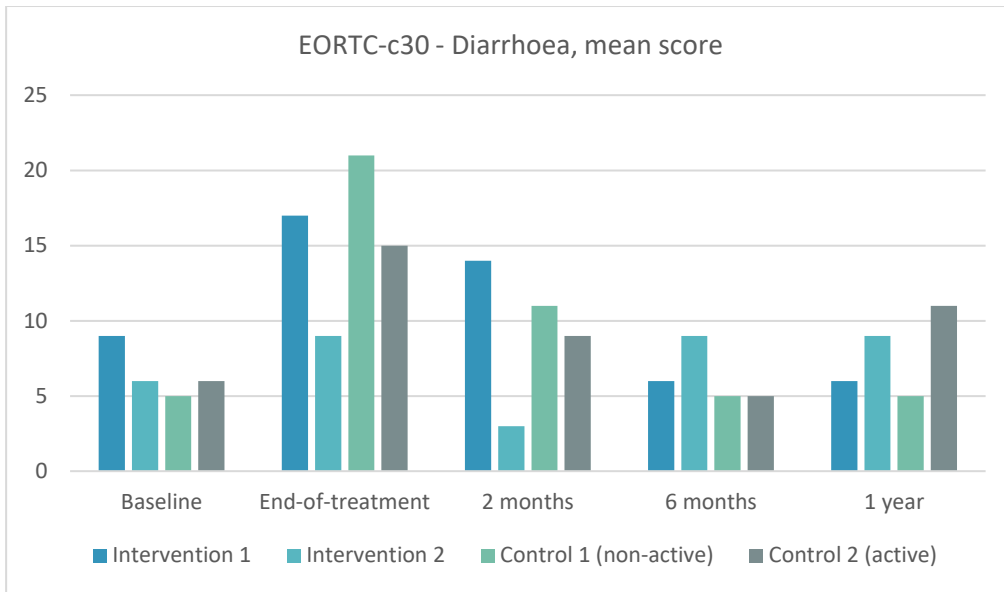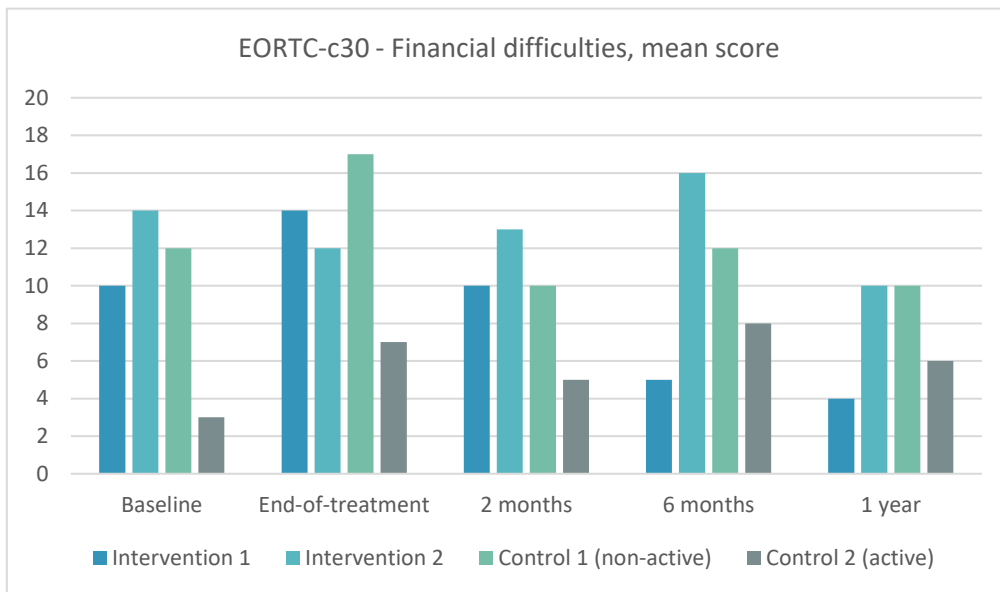

### Online resource 4: Raw data graphs on four group

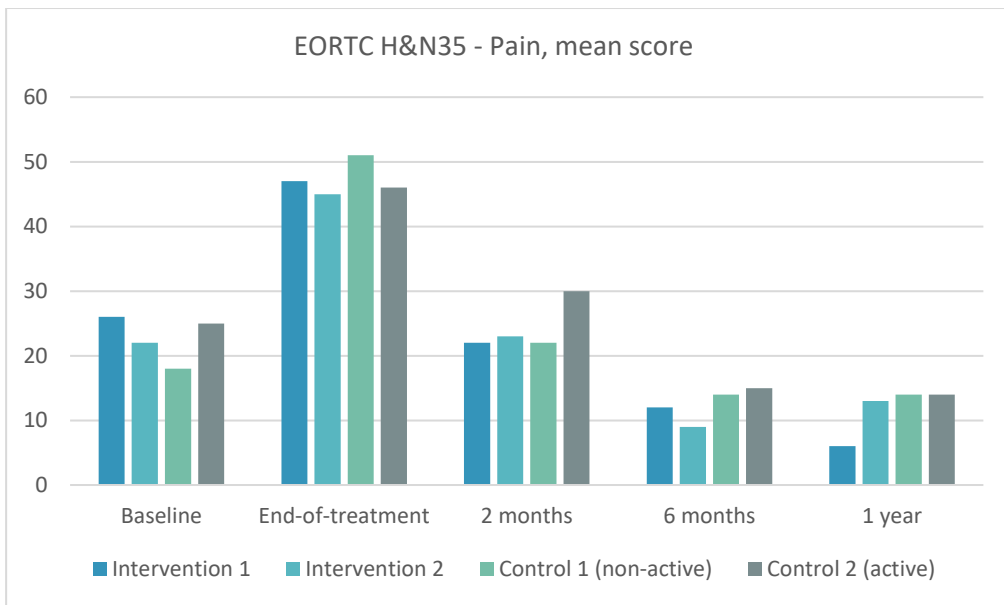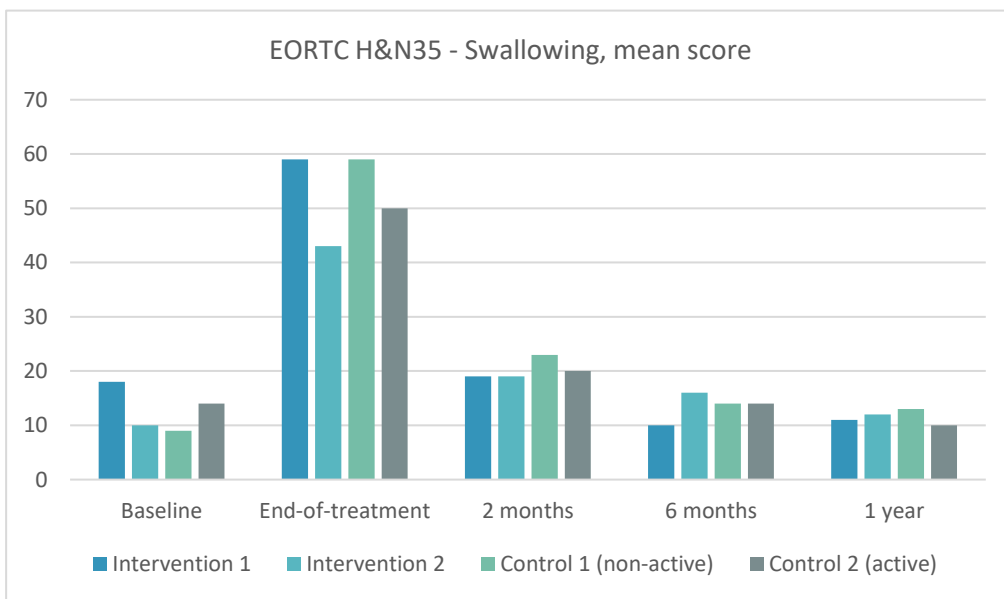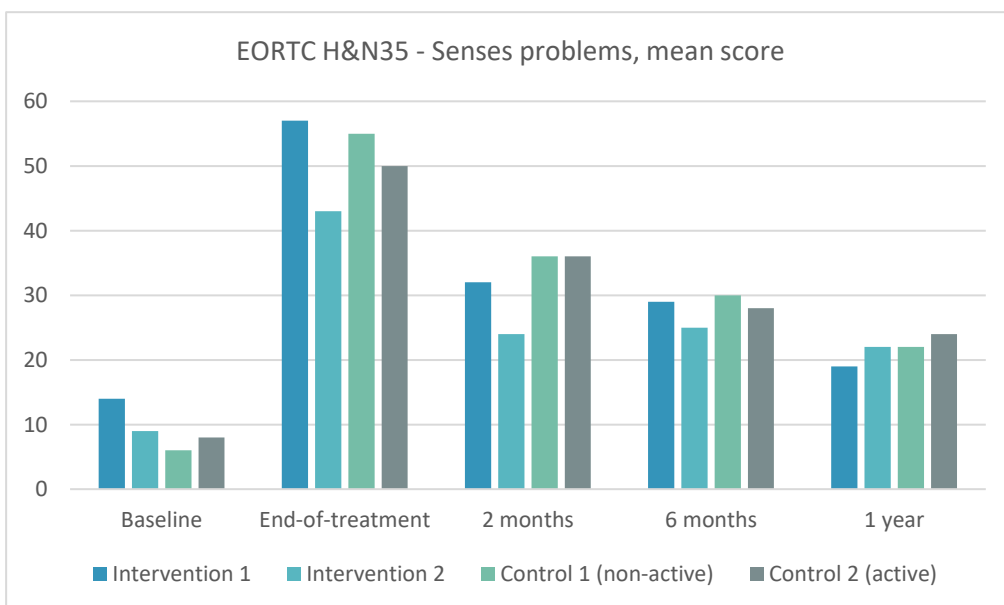

#### Online resource 4: Raw data graphs on four group

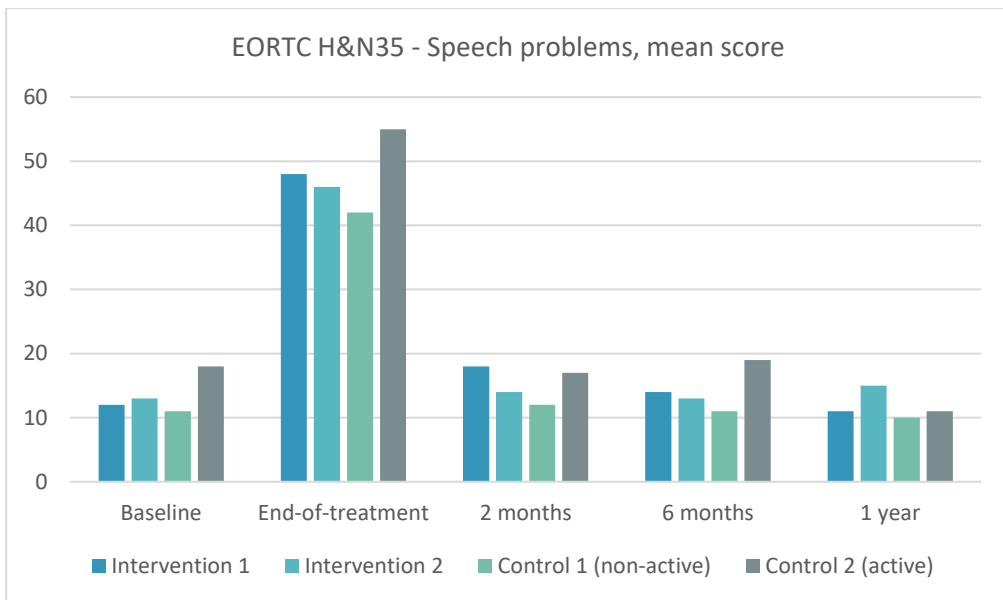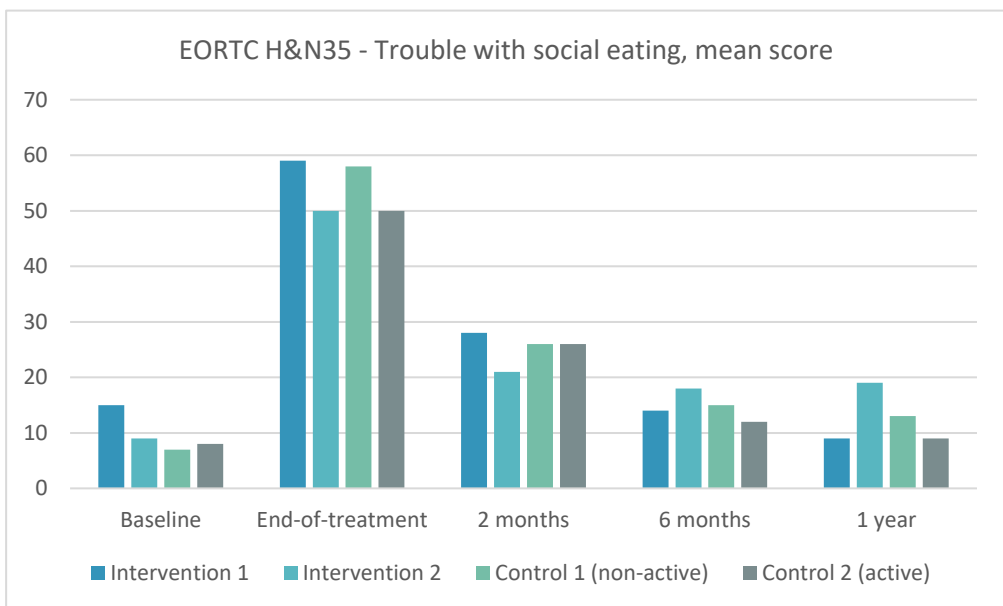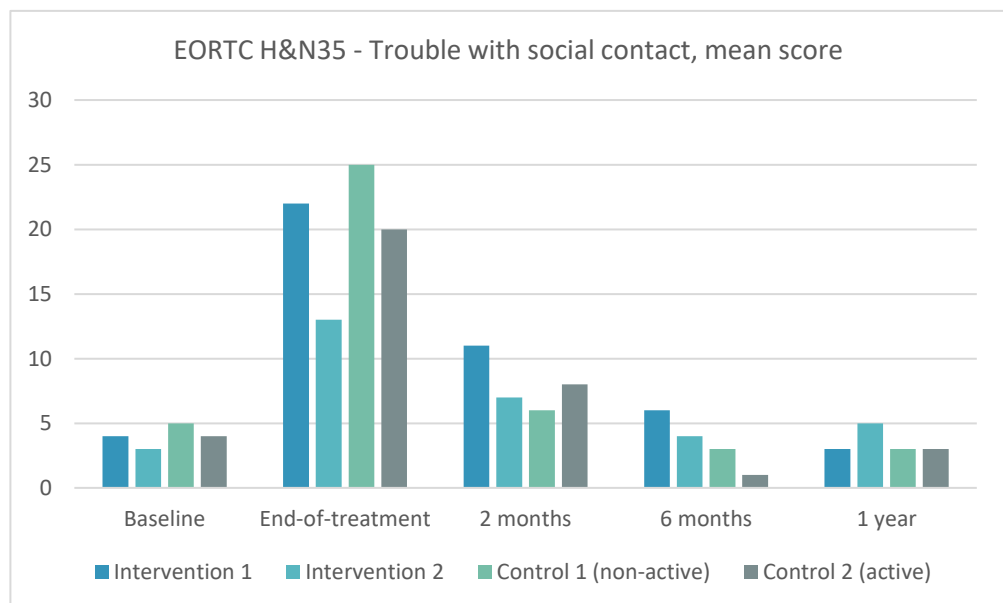

### Online resource 4: Raw data graphs on four group

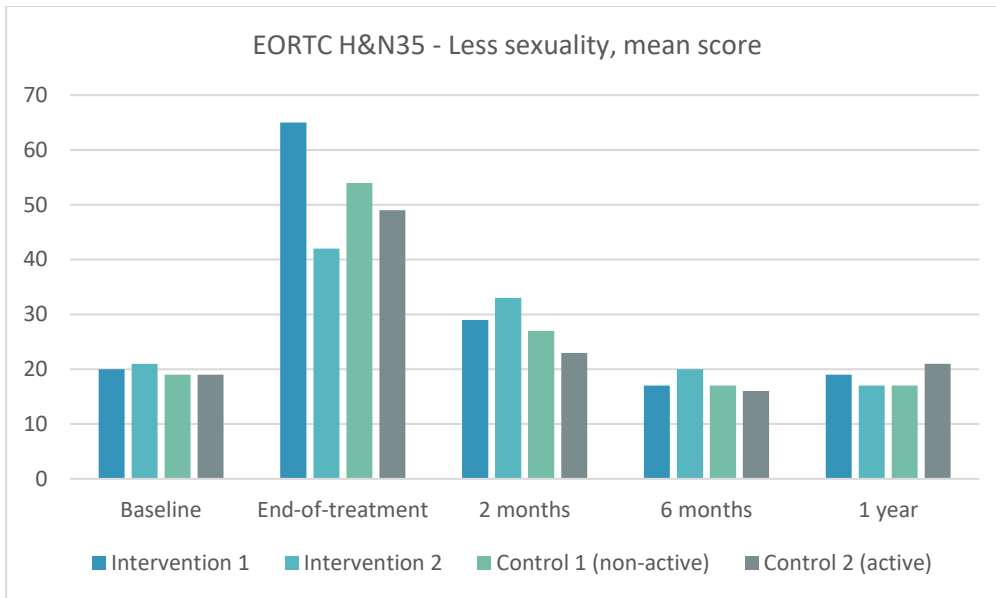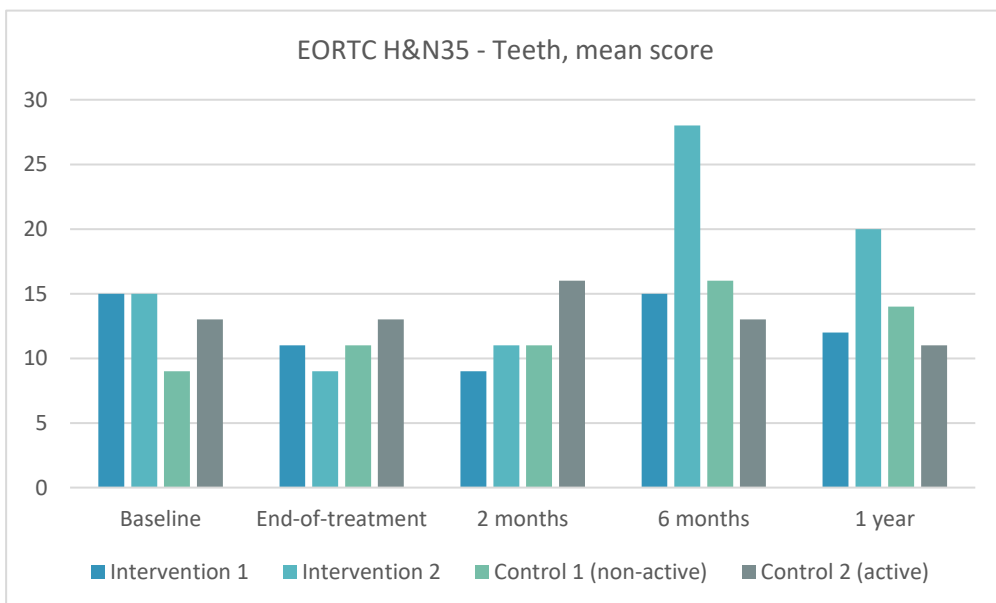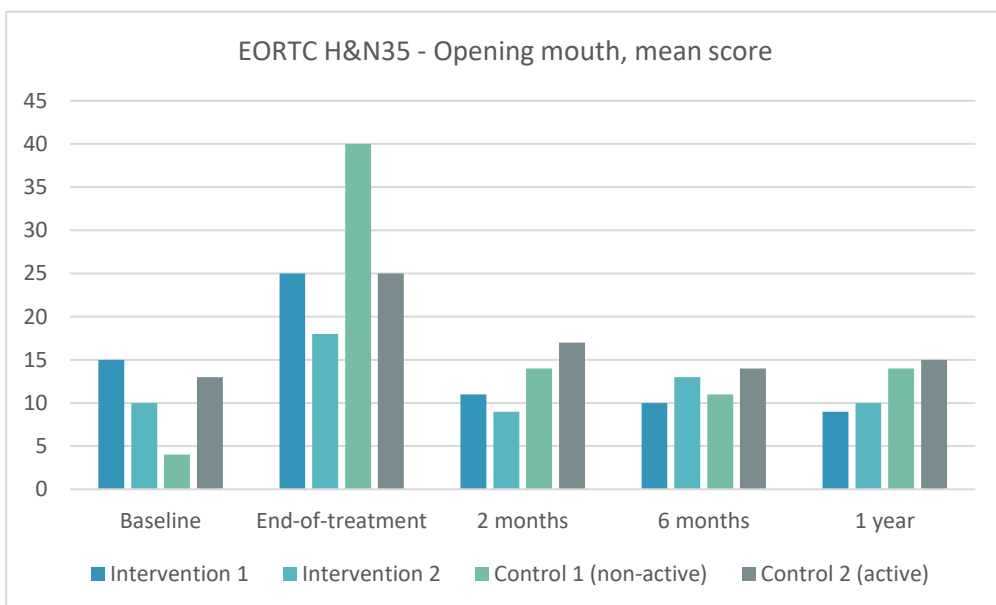

#### Online resource 4: Raw data graphs on four group

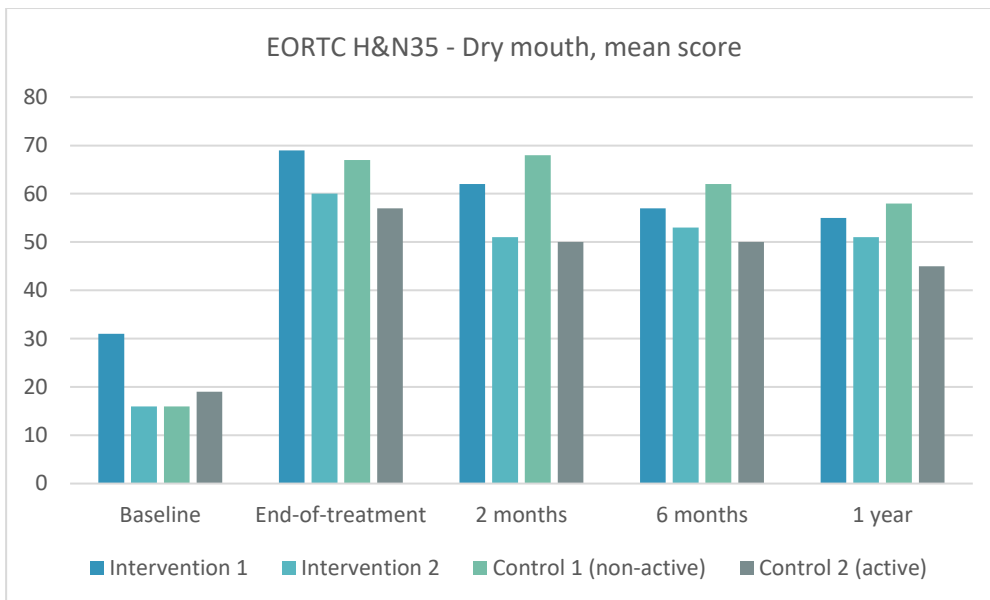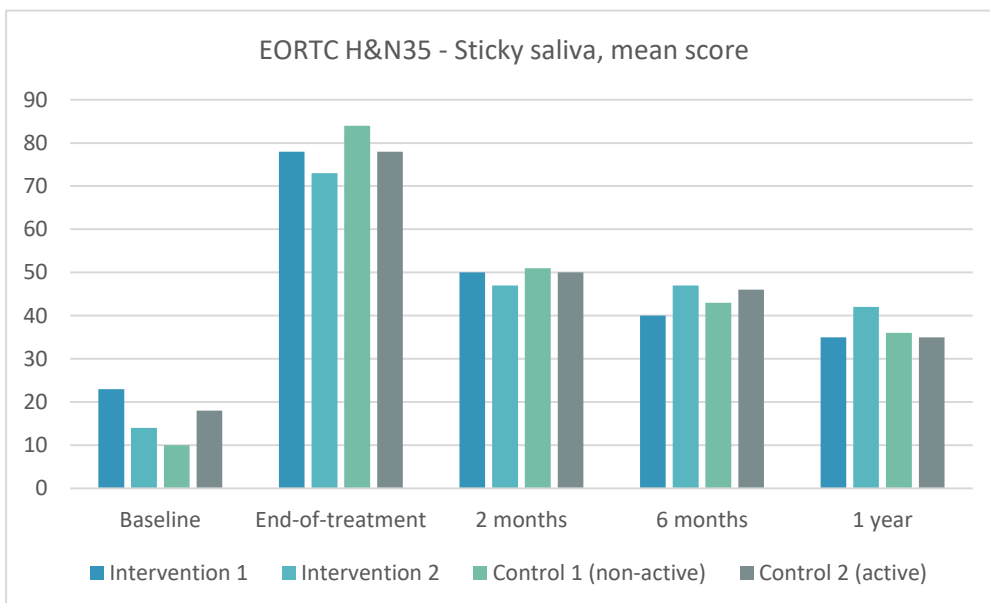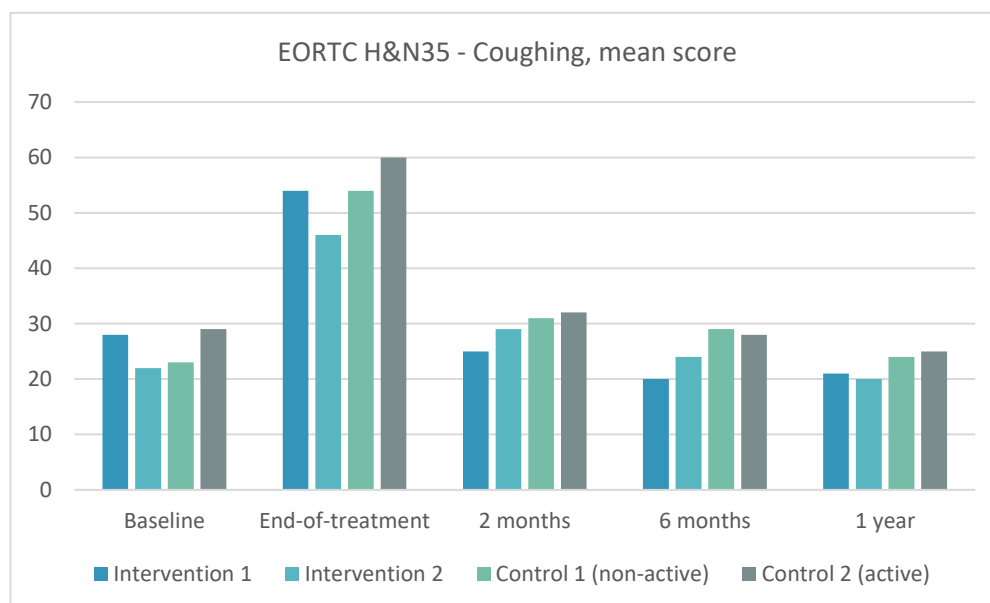

#### Online resource 4: Raw data graphs on four group

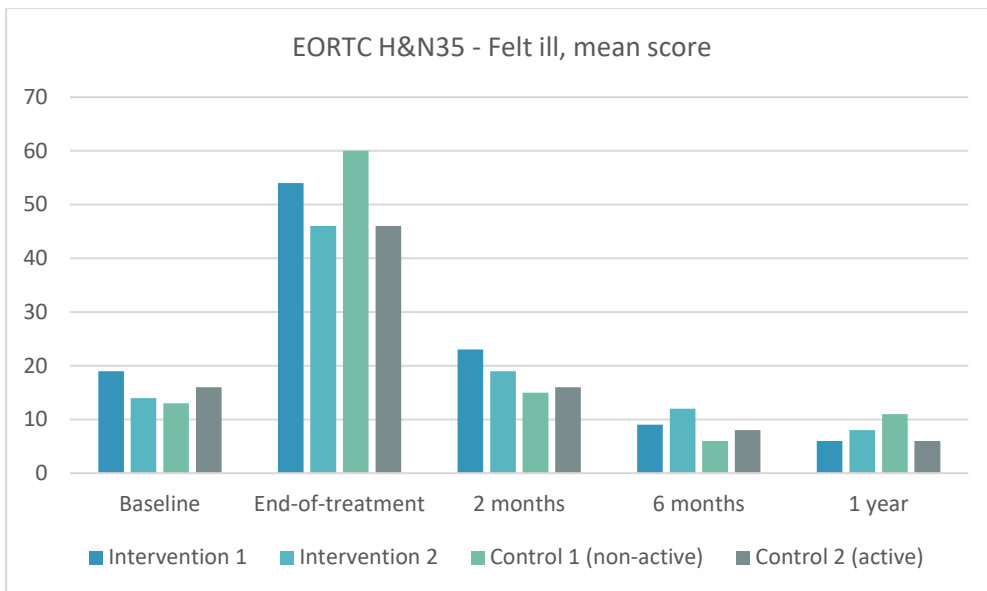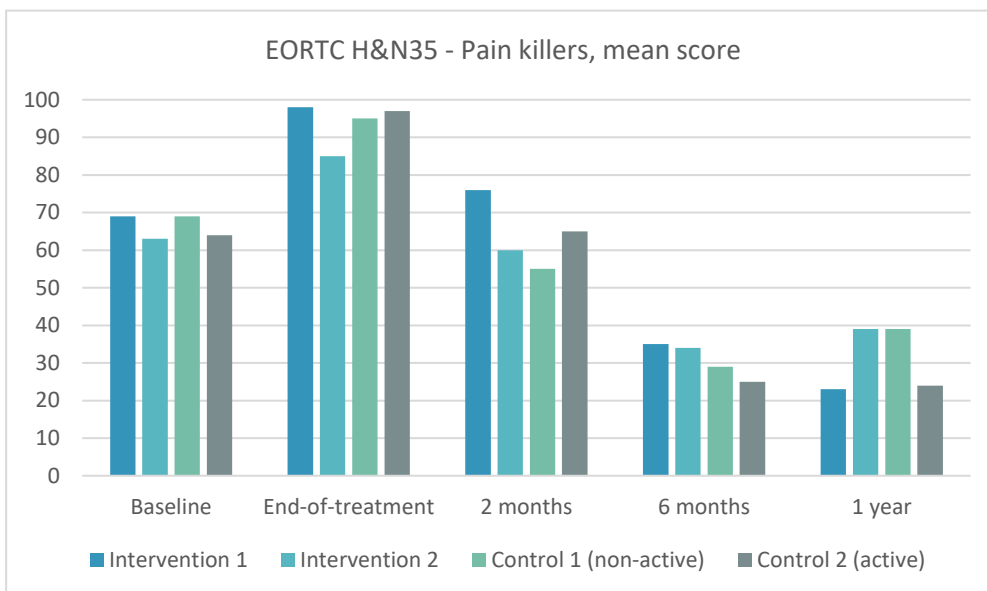

**Article title:** Swallowing exercises during head and neck cancer treatment – results of a randomized trial

**Journal:** *Dysphagia* .

**Authors:** Hajdú SF, Wessel I, Dalton SO, Eskildsen, SJ, Johansen C.

**Corresponding author:** Sara Fredslund Hajdú, dept of occupational therapy and physiotherapy, Copenhagen University Hospital Rigshospitalet, Denmark & Cancer Late Effects Research Unit (CASTLE), Department of Oncology, Copenhagen University Hospital Rigshospitalet, Denmark. [sara.fredslund.hajdu@regionh.dk](mailto:sara.fredslund.hajdu@regionh.dk)
